# Supplementary material for: The global burden of Chikungunya fever among children: A systematic literature review and meta-analysis
Source: PLOS Glob Public Health. 2022 Dec 21;2(12):e0000914. doi: 10.1371/journal.pgph.0000914 (PMC10022366; doi:10.1371/journal.pgph.0000914)
Supplement: S1 Table — (XLSX) [file pgph.0000914.s003.xlsx]

## Sheet: Sheet1
Supplementary Table 2: Full details of 142 studies identified by a systematic literature search for Chikungunya infection among children published between 1983 and 2021 inclusive
										Age of participants														Case definition					Diagnostic test
	First Author and year of publication	Date of extraction	Study title	Article accessible: yes/no	Publication language	Country of study	Continent	Study setting (community, home, health centre/hospital, military facility)	Type of participants	Age of participants	Infants (<1 year)	Children (1-12 years)	Teenagers/adoloscents (13-18 years)	Mixed (0-18 years)	Unspecified	Male	Female	Sample size	Inclusion criteria specified: yes, no or N/A	Exclusion criteria specified: yes, no or N/A	Study design( unspecified)	Epidemic or non-epidemic season/ unspecified	Detected viral strain	Positive IgM	Positive RNA	Positive IgM and RNA	Positive IgM or RNA	Unspecified	Anti IgM	RT-PCR	Both	Specificity(%)	Sensitivity%	Sampling technique	Study design( unspecified)	Study start date	Study end date	Duration of study	Informed consent received: yes/unspecified	Ethical clearance provided: yes/unspecified	Proportion of children tested postive for CHIKV infection
1	Antonio et al 2019; PMID: 30897135	2021-03-02	Retrospective investigation of antibodies against chikungunya virus (CHIKV) in serum from febrile patients in Mozambique, 2009-2015: Implications for its prevention and control	Yes	English	Mozambique	Africa	Community	Children	IQR=1-5Years, Median= 2 years				✔		500	395	895	Yes	Yes	Longitudinal	Non-epidemic	unspecified	✔					✔			unspecified	unspecified	Random	Retrospective Longitudinal	2009	2015	6years	no	yes	54/895
2	Robillard et al 2006; PMID: 16710146	2021-03-02	Vertical maternal fetal transmission of the chikungunya virus: Ten cases among 84 pregnant women	Yes	French	Reunion Island	Africa	Health centre	Newborn	Newborns	✔					unspecified	unspecified	10	Yes	Yes	Case report	Epidemic	unspecified			✔					✔	unspecified	unspecified	Purposive	Case reports	2005-06-01	2006-01-01	7 months	Unspecified	Unspecified	10/84
3	Oliveira et al 2018; PMID: 30012112	2021-03-02	Maternal and infant death after probable vertical transmission of chikungunya virus in Brazil -case report	Yes	English	Brazil	South America	Hospital	Newborn	Newborn	✔					1	0	1	Yes	Yes	Case report	Epidemic	unspecified	✔					✔			unspecified	unspecified	Purposive	Case reports	2021-04-15	2017-04-23	8days	Unspecified	Unspecified	1/1
4	Ramos et al 2018; PMID: 28737626	2021-03-02	Perinatal Chikungunya Virus-associated Encephalitis Leading to Postnatal-Onset Microcephaly and Optic Atrophy	Yes	English	Brazil	South America	Hospital	Newborn	Newborn	✔					1	0	1	Yes	Yes	Case report	unspecified	unspecified		✔					✔		unspecified	unspecified	Purposive	Case reports	2016-02-01	2017-02-01	1 year	Unspecified	Yes	1/1
5	Horwood et al 2017; PMID: 28536430	2021-03-02	Aetiology of acute meningoencephalitis in Cambodian children, 2010-2013	Yes	English	Cambodia	Asia	Hospital	Children	1month-15yrs				✔		673	483	1160	Yes	Yes	Longitudinal	non-epidemic	unspecified			✔					✔	unspecified	unspecified	Random stratified	prospective observational	2010-07-01		3.5 years	Yes	Yes	23/1160
6	Krus et al 2018; PMID: 30085171	2021-03-03	Rhabdomyolysis in children: Three exotic presentations from Suriname	Yes	English	Suriname/S.America	South America	Hospital	Children	5,11,15 yrs				✔		3	unspecified	3	unspecified	unspecified	Case report	Epidemic	unspecified		✔					✔		unspecified	unspecified	Purposive	Observational Case report	2014	2014	1week	Unspecified	Unspecified	1/3
7	Crump et al 2013; PMID: 23875053	2021-03-03	Etiology of Severe Non-malaria Febrile Illness in Northern Tanzania: A Prospective Cohort Study	Yes	English	Tanzania	Africa	Hospital	Children	Children 2months - 13 yrs Adults, 13-96 yrs				✔		unspecified	unspecified	467	Yes	Yes	Longitudinal	Non epidemic	unspecified		✔					✔		unspecified	unspecified	Census	Prospective cohort observational	2007-09-17	2008-08-31	11 months	Yes	Yes	34/467
8	Genderen et al 2016; PMID: 27082985	2021-03-03	First Chikungunya Outbreak in Suriname; Clinical and Epidemiological Features	Yes	English	Suriname/S.America	South America	Community and Hospital	Children	1-12yrs and above 12				✔		unspecified	unspecified	13	Yes	Yes	Cross-sectional	Epidemic	unspecified		✔					✔		unspecified	unspecified	Cross-sectional three stage cluster sampling and	Cross-sectional	2014-08-01	2015-04-01	8 Months	Yes	Yes	Unspecified
9	Boumahni et al 2011; PMID: 21269816	2021-03-03	Maternal-fetal chikungunya infection associated with Bernard-Soulier syndrome	Yes	French	Reunion Island	Africa	Hospital	Child	3 days	✔					1	0	1	unspecified	unspecified	Case report	Epidemic	unspecified			✔				✔		unspecified	unspecified	Unspecified	Case report	Unspecified	Unspecified	Unspecified	No	No	1/1
10	Nigam et al 2016; PMID: 28405994	2021-03-03	Vertical Transmission of Chikungunya Manifesting as Foetal Pericardial Effusion	Yes	English	India	Asia	Hospital	Neonate	0	✔					0	1	1	unspecified	unspecified	Case report	Epidemic	unspecified		✔					✔		unspecified	unspecified	Unspecified	case report	Unspecified	Unspecified	72HRS	Unspecified	Unspecified	1/1
11	Dorleans et al 2018; PMID: 29692295	2021-03-03	Outbreak of Chikungunya in the French Caribbean Islands of Martinique and Guadeloupe: Findings from a Hospital-Based Surveillance System (2013-2015)	Yes	English	Caribbean Islands of Martinique and Guadeloupe	North America	Hospital	Children	0-96 yrs				✔		14	1	647	Yes	yes	Surveillance	Epidemic	unspecified				✔				✔	unspecified	unspecified	Unspecified	Active hospital based surveillance	2013-12-01	2015-01-01	1year	Yes	Yes	Unspecified
12	Tazeen et al 2016; PMID: 28910810	2021-03-04	Concurrent Infection with Plasmodium vivax and the Dengue and Chikungunya Viruses in a Paediatric Patient from New Delhi, India in 2016	Yes	English	India	Asia	Health centre	Infant	3yrs		✔				1	0	1	unspecified	unspecified	Case report	Epidemic	unspecified					✔		✔		unspecified	unspecified	Unspecified	Case report	2016	2016	1 day	Yes	Yes	1/1
13	Robinson et al 2018; PMID: 29582731	2021-03-04	Vector-borne disease is a common cause of hospitalized febrile illness in India	Yes	English	India	Asia	Hospital	Children	above 6months				✔		unspecified	unspecified	755	Yes	yes	Longitudinal	Non-epidemic	unspecified					✔	✔			unspecified	unspecified	census	Prospective observational	2013-07-01	2015-12-01	2.5 years	Yes	yes	5/605
14	Riyaz et al 2010; PMID: 21079311	2021-03-04	Cutaneous manifestations of chikungunya during a recent epidemic in Calicut, north Kerala, south India	Yes	English	India	Asia	Community and Health centre	Children	39days to 78years				✔		7	11	23	Yes	yes	Cross-sectional	Epidemic	unspecified					✔	✔			unspecified	unspecified	Unspecified	Prospective descriptive	2009-07-01	2009-09-01	3months	unspecified	unspecified	Unspecified
15	Chandorkar et al 2017; PMID: 28942395	2021-03-04	Fever, marked tachycardia and vesiculobullous rash in an infant with Chikungunya fever	Yes	English	India	Asia	Hospital	Infant	3 months	✔					unspecified	unspecified	1	unspecified	unspecified	Case report	non-epidemic	unspecified					✔		✔		unspecified	unspecified	Case	Case report	Unspecified	Unspecified	Unspecified	unspecified	unspecified	1/1
16	Robin et al 2008; PMID: 18287573	2021-03-05	Neurologic manifestations of pediatric Chikungunya infection	Yes	English	Reunion	Africa	Hospital	Children	<18 yrs				✔		23	7	30	Yes	yes	Case series	Epidemic	unspecified				✔				✔	unspecified	unspecified	Purposive sampling	Retrospective descriptive	Jan 1 2006	May 31 2006	5months	unspecified	unspecified	30/30
17	Lenglet et al, 2006; PMID: 17003745	2021-03-05	Chikungunya infection in pregnancy: Evidence for intrauterine infection in pregnant women and vertical transmission in the parturient. Survey of the Reunion Island outbreak	Yes	French	Reunion	Africa	Hospital	Newborn	Newborn	✔					unspecified	unspecified	33	Yes	yes	Longitudinal	Epidemic	unspecified					✔		✔		unspecified	unspecified	Unspecified	Retrospective cohort	2005-06-01	2006-02-28	9 months	Unspecified	unspecified	16/33
18	Anwar et al 2020; PMID: 32092073	2021-03-05	Chikungunya outbreak in Bangladesh (2017): Clinical and hematological findings	Yes	English	Bangladesh	Asia	Community	Children	Children <15yrs				✔		unspecified	unspecified	32	Yes	yes	Longitudinal	Epidemic	unspecified				✔				✔	unspecified	unspecified	Unspecified	Prospective cohort	2017-06-30	2017-08-04	2months	Yes	unspecified	Unspecified
19	Chipwaza et al 2014; PMID: 25412076	2021-03-08	Dengue and Chikungunya Fever among Viral Diseases in Outpatient Febrile Children in Kilosa District Hospital, Tanzania	Yes	English	Tanzania	Africa	Hospital	Children	2-13 yrs				✔		6	181	364	Yes	yes	Cross-sectional	unspecified	unspecified	✔					✔			unspecified	unspecified	Unspecified	Cross-sectional	March 2013 and	May 2013 and	6months	Yes	yes	17/364
20	Manimunda et al 2010; PMID: 20889860	2021-03-08	Short report: Outbreak of chikungunya fever, Dakshina Kannada District, South India, 2008	Yes	English	India	Asia	Community/ Health centre	Children	<13 years				✔		unspecified	unspecified	241	Yes	yes	Cross-sectional	Epidemic	unspecified					✔	✔			0.965	unspecified	Systematic sampling	Cross-sectional survey	2008-08-01	2008-09-01	2months	Yes	yes	98/241; 28/75
21	Mendez-Dominguez et al 2016; PMID: 27032486	2021-03-08	Septic shock secondary to non-congenital chikungunya fever in a young infant: A clinical case	Yes	English	Mexico	North America	Hospital	Infant	1 month	✔					unspecified	unspecified	unspecified	unspecified	unspecified	Case report	unspecified	unspecified					✔			✔	unspecified	unspecified	Unspecified	Case report	Unspecified	Unspecified	Unspecified	Unspecified	unspecified	1/1
22	White et al 2018; PMID: 29851952	2021-03-10	Detection and phylogenetic characterization of arbovirus dual-infections among persons during a chikungunya fever outbreak, Haiti 2014	Yes	English	Haiti	North America	School clinic	Children	Mean age = 9.6 years				✔		44	38	100	Yes	Yes	Cross-sectional	epidemic	unspecified		✔					✔		unspecified	unspecified	census	unspecified	2014-05-01	2014-08-01	4 months	Yes	Yes	82/100
23	Alvez et al 2018; PMID: 30510900	2021-03-10	Chikungunya infection and horner syndrome	Yes	English	Brazil	South America	Hospital	Infant	2 months	✔					unspecified	unspecified	unspecified	unspecified	unspecified	Case report	unspecified	unspecified					✔	✔			unspecified	unspecified	Unspecified	Case report	Jan 13 2018	Jan 23 2018	10 days	Yes	Yes	1/1
24	Beserra et al 2019; PMID: 30994798	2021-03-10	Short Communication Clinical and laboratory profiles of children with severe chikungunya infection	Yes	English	Brazil	South America	Hospital	children	36days - 16years				✔		1	1	14	Yes	Yes	Case series	unspecified	unspecified				✔		✔			unspecified	unspecified	Unspecified	Case series report	2016-05-01	2017-04-01	1year	unspecified	yes	14/14
25	Duksha et al 2007; PMID: 17721376	2021-03-22	Mother-to-child transmission of Chikungunya virus infection	Yes	English	Reunion	Africa	Hospital	Neonates	0-1month	✔					22	16	32	Yes	Yes	Longitudinal	unspecified	unspecified		✔					✔		unspecified	unspecified	Unspecified	Retrospective descriptive	2005-03-01	2006-04-01	1 yr	unspecified	unspecified	38/38
26	Farias et al 2019; PMID: 31271622	2021-03-22	Extensive vesiculobullous exanthema following chikungunya fever in a 13-year-old patient	Yes	English	Brazil	South America	Hospital	Child	13yrs			✔			unspecified	unspecified				Case report	Unspecified	unspecified					✔	✔			unspecified	unspecified	Unspecified	case report	Unspecified	Unspecified	Unspecified	Yes	Yes	1/1
27	Alvarado-socarras et al 2016; PMID: 27125272	2021-03-23	Congenital and neonatal chikungunya in Colombia	Yes	English	Colombia	South America	Hospital	Children	1 year old and 20day old	✔					1	1	2	Yes	Yes	Case series	Epidemic	unspecified	✔					✔			unspecified	unspecified	Unspecified	Case series report	Unspecified	Unspecified	Unspecified	Unspecified	Unspecified	2/2
28	Auget et al 2016	2021-03-23	COL 7-02 - Prospective study of mother-to-child transmission of Chikungunya virus	Yes	French	Polynesia French	Oceania	Hospital	Neonates	0 yrs	✔					unspecified	unspecified	N=33	Unspecified	Unspecified	Unspecified	Epidemic	unspecified					✔		✔		unspecified	unspecified	Unspecified	Unspecified	Unspecified	Unspecified	Unspecified	Unspecified	Unspecified	13/33
29	Inziani et al, 2019; PMID: 31712089	2021-03-23	Seroprevalence of yellow fever, dengue, West Nile and chikungunya viruses in children in Teso South Sub-County, Western Kenya	Yes	English	Kenya	Africa	Hospital	Children	1-12yrs		✔				unspecified	unspecified	649	Yes	Yes	Cross-sectional	Non-epidemic	unspecified					✔	✔			unspecified	unspecified	Unspecified	Cross sectional survey	2010-08-01	2011-02-01	8 months	Yes	Yes	36/649
30	Kumar et al 2019; PMID: 29893939	2021-03-23	Experience of perinatal and neonatal chikungunya virus (CHIKV) Infection in a tertiary care neonatal centre during outbreak in North India in 2016: A case series	Yes	English	India	Asia	Hospital	Infants	3 days to 3 months	✔					14	2	16	Yes	Yes	Case series	Epidemic	unspecified					✔		✔		unspecified	unspecified	Unspecified	Case series report	2016-08-01	2016-11-01	4 months	Unspecified	Unspecified	16/16
31	Lewthwaite et al 2009; PMID: 19193287	2021-03-23	Chikungunya virus and central nervous system infections in children, India	Yes	English	India	Asia	Hospital	Children	8months - 16yrs				✔		37	29	66	Yes	Yes	Cross-sectional	unspecified	IOL Strains					✔		✔		unspecified	unspecified	Unspecified	Unspecified	2006-01-01	2006-10-01	8 months	yes	Yes	8/58
32	Vasani et al 2015; PMID: 26205895	2021-03-23	Congenital Chikungunya presenting with centrofacial pigmentation	Yes	English	Not stated	Unspecified	Hospital	Neonate	12 days	✔					1	0	1	unspecified	unspecified	Case report	unspecified	unspecified					✔	✔			unspecified	unspecified	Unspecified	Case report	Unspecified	Unspecified	Unspecified	Unspecified	Unspecified	1/1
33	Shenoy and pradeep 2012; PMID: 22484743	2021-03-23	Neurodevelopmental outcome of neonates with vertically transmitted chikungunya fever with encephalopathy	Yes	English	India	Asia	Hospital	infants	3years		✔				1	1	2	unspecified	unspecified	Case report	unspecified	unspecified					✔		✔		unspecified	unspecified	Unspecified	Case report	Unspecified	Unspecified	Unspecified	Unspecified	Unspecified	2/2
34	Elenga et al 2017; PMID: 28060043	2021-03-09	Chikungunya Infection in Hospitalized Febrile Infants Younger Than 3 Months of Age	Yes	English	French Guiana	South America	Hospital	infants	<3months	✔					53	67	120	Yes	Yes	Longitudinal	Epidemic	unspecified		✔					✔		unspecified	unspecified	Unspecified	preliminary retrospective and a Descriptive monocentric prospective study	2014-03-01	2015-02-28	1year	yes	yes	26/120
35	Menon et al 2010; PMID: 20803176	2021-03-09	A child with serious chikungunya virus (CHIKV) infection requiring intensive care, after an outbreak	Yes	English	Not stated	Unspecified	Pediatric ICU	Child	5.5 yrs				✔		1	0	1	unspecified	unspecified	Case report	non-epidemic	unspecified					✔	✔			unspecified	unspecified	Unspecified	Case report	2009-05-12	2009-07-12	2 months	unspecified	unspecified	1/1
36	Prabhu, 2015; PMID: 25728940	2021-03-09	Acquired auditory neuropathy spectrum disorder after an attack of chikungunya: case study	Yes	English	Not stated	Unspecified	Audiology clinic	Teenager	14			✔			1	0	1	unspecified	unspecified	Case report	unspecified	unspecified	✔					✔			unspecified	unspecified	Purposive	Case report	Unspecified	Unspecified	Unspecified	Yes	Yes	1/1
37	Jebain et al 2020; PMID: 33088712	2021-03-09	Perinatal chikungunya induced scalded skin syndrome	Yes	English	Brazil	South America	Hospital	Neonate	7days	✔					unspecified	unspecified	1	unspecified	unspecified	Case report	unspecified	unspecified					✔			✔	unspecified	unspecified	Purposive	Case report	Unspecified	Unspecified	Unspecified	Unspecified	unspecified	1/1
38	Ernould et al 2008; PMID: 18321688	2021-03-16	Chikungunya in paediatrics: Epidemic of 2005-2006 in Saint-Denis, Reunion Island	Yes	French	Reunion	Africa	Hospital	Children	3wks -17yrs				✔		50	36	86	Yes	Yes	Cross-sectional	Epidemic	unspecified					✔			✔	unspecified	unspecified	Unspecified	Descriptive retrospective monocentric	2006-01-01	30th April 2006	4 months	Unspecified	Unspecified	Unspecified
39	Cardona-Correa et al 2017; PMID: 28542664	2021-03-22	Vertical transmission of chikungunya virus infection. Case Report	Yes	English	Colombia	South America	Hospital	Neonate	5days	✔					unspecified	unspecified	1			Case report	unspecified	unspecified	✔					✔			unspecified	unspecified	Unspecified	Case Report	Unspecified	Unspecified	8days	Yes	Yes	1/1
40	Correa et al 2020; PMID: 31806601	2021-03-22	Brain MR imaging of patients with perinatal chikungunya virus infection	Yes	English	Not stated	Unspecified	Hospital	Neonates	5-10 days	✔					unspecified	unspecified	8	Yes	Yes	Case series	unspecified	unspecified				✔				✔	unspecified	unspecified	Purposive	Case series report	Unspecified	Unspecified	Unspecified	Yes	Unspecified	8/8
41	Calvo et al 2016; PMID: 27622791	2021-03-22	Dengue and Chikungunya differential diagnosis in pediatric patients	Yes	Spanish	Colombia	South America	Hospital	Children	0-10 yrs				✔		unspecified	unspecified	8	Yes	Yes	Case series	Unspecified	unspecified		✔					✔		unspecified	unspecified	Purposive	Case series report	2015-02-01	2015-02-01	1 day	Unspecified	Yes	8/8
42	Laoprasopwattana et al 2012; PMID: 22301475	2021-03-22	Differential diagnosis of chikungunya, dengue viral infection and other acute febrile illnesses in children	Yes	English	Thailand	Asia	Hospital	Children	1mnth-15yrs				✔		unspecified	unspecified	50	Yes	Yes	Longitudinal	Unspecified	unspecified			✔				✔		unspecified	unspecified	Unspecified	Prospective cohort	2009-04-01	2009-07-01	4 months	Unspecified	Unspecified	32/50
43	le Bomin et al 2008; PMID: 19068981	2021-03-15	Confirmed chikungunya in children in Mayotte. Description of 50 patients hospitalized from February to June 2006	Yes	French	Mayotte island	Africa	Hospital	Children	Mean = 9.3 yrs				✔		1	5	1287			Cross-sectional	Epidemic	unspecified					✔		✔		unspecified	unspecified	Unspecified		2006-02-01	2006-06-01	5months	unspecified	unspecified	50/1287
44	Dubrocq et al 2017; PMID: 28903519	2021-03-15	Septic shock secondary to chikungunya virus in a 3-month-old traveler returning from Honduras	Yes	English	Not stated	Unspecified	Hospital	Infant	3 months	✔					0	1	1	unspecified	unspecified	Case report	unspecified	unspecified			✔					✔	unspecified	unspecified	Unspecified	Case report	2014	2014	9 days	unspecified	unspecified	1/1
45	Geraldin et al 2008; PMID: 18351797	2021-03-15	Multidisciplinary prospective study of mother-to-child chikungunya virus infections on the island of La Reunion	Yes	English	La reunion	Africa	Hospital	Neonates	0	✔					unspecified	unspecified	39	Yes	Yes	Longitudinal	Epidemic	unspecified				✔				✔	unspecified	unspecified	Unspecified	Prospective	2005-06-01	2006-06-30	1yr	Yes	Unspecified	19/39
46	Mercado et al 2018; PMID: 29604514	2021-03-15	Renal involvement in fatal cases of chikungunya virus infection.	Yes	English	Colombia	South America	Hospital	Children	1yr and 5 years		✔				2	1	3	unspecified	unspecified	Case series	Unspecified	unspecified		✔					✔		unspecified	unspecified	Purposive	Retrospective observational case series	2014-09-01	2015-10-01	1 yr	Unspecified	Unspecified	3/3
47	Pellot et al 2012; PMID: 22693937	2021-03-23	[Severe forms of chikungunya virus infection in a pediatric intensive care unit on Reunion Island]	Yes	French	Reunion	Africa	Hospital	Children	1month to 15 years				✔		unspecified	unspecified	9			Case series	Epidemic	unspecified					✔				unspecified	unspecified	Unspecified	Retrospective single center study	2006-01-01	2006-04-01	4 months	unspecified	unspecified	Unspecified
48	Kumar et al 2014; PMID: 24953593	2021-03-23	Brownie-nose: hyperpigmentation in neonatal chikungunya	Yes	English	India	Asia	Hospital	Neonate	1 day	✔					unspecified	unspecified	unspecified	unspecified	unspecified	Case report	unspecified	unspecified					✔	✔			unspecified	unspecified	Unspecified	Image report	Unspecified	Unspecified		unspecified	unspecified	Unspecified
49	Gopakumar and Ramachandran 2012; PMID: 24027715	2021-03-23	Congenital chikungunya	Yes	English	India	Asia	Hospital	Neonate		✔					unspecified	unspecified	1	unspecified	unspecified	Case report	Epidemic	unspecified					✔	✔			unspecified	unspecified	Unspecified	Unspecified	Unspecified	Unspecified		unspecified	unspecified	1/1
50	Tracy evans-Gilbert 2017; PMID: 28167590	2021-03-23	Case Report: Chikungunya and Neonatal Immunity: Fatal Vertically Transmitted Chikungunya Infection	Yes	English	Jamaica	North America	Hospital	neonates	4 days	✔					1	0	2	unspecified	unspecified	Case report	Epidemic	unspecified					✔		✔		unspecified	unspecified	Unspecified	Case report	2014	2014	4 days	unspecified	unspecified	2/2
51	Anu Kantele 2019; PMID: 30892179	2021-03-24	Travellers as sentinels of chikungunya epidemics: A family cluster among finnish travellers to Koh Lanta, Thailand, January 2019	Yes	English	Finland	Europe	Hospital	Children	5yrs - 14yrs				✔		unspecified	unspecified	unspecified	unspecified	unspecified	Case report	Unspecified	unspecified					✔	✔			unspecified	unspecified	Purposive	Case report	Jan,2019	2019-01-01	1month	unspecified	unspecified	Unspecified
52	Sow et al 2018; PMID: 29354659	2021-03-24	Chikungunya Outbreak in Kedougou, Southeastern Senegal in 2009-2010.	Yes	English	Senegal	Africa	Hospital/School	Children	0-14yrs				✔		unspecified	unspecified	866	Yes	Yes	Cross-sectional	Epidemic	unspecified				✔				✔	unspecified	unspecified	Unspecified	Passive and active surveillance, Prospective cohort	2009-05-01	2009-11-01	7months	Yes	Yes	25/866
53	Saha et al 2019; PMID: 31848287	2021-03-24	Unbiased metagenomic sequencing for pediatric meningitis in bangladesh reveals neuroinvasive chikungunya virus outbreak and other unrealized pathogens	Yes	English	Bangladesh	Asia	Hospital	Children	0-160 months				✔		49	42	91	Yes	Yes	Longitudinal	Epidemic	ECSA genotype					✔		✔		unspecified	unspecified	Unspecified	Retrospective case-control	2012	2018	6 years	Yes	Yes	17/472
54	Bandeira et al 2016; PMID: 27500084	2021-03-24	Neonatal encephalitis due to Chikungunya vertical transmission: First report in Brazil	Yes	English	Brazil	South America	Hospital	Neonate	4days	✔					1	0	1	unspecified	unspecified	Case report	Epidemic	unspecified					✔		✔		unspecified	unspecified	Unspecified	Case report	2016-11-24	2016-12-09	16 days	unspecified	Yes	1/1
55	Teixeira et al 2019; PMID: 30830174	2021-03-24	Acute Disseminated Encephalomyelitis after Chikungunya Infection	Yes	English	Brazil	South America	Hospital	Teenager	16 years			✔			0	1	1	unspecified	unspecified	Case report	unspecified	unspecified					✔	✔			unspecified	unspecified	Unspecified	Case report				unspecified	Unspecified	1/1
56	Raghavendhar et al 2016; PMID: 26581026	2021-03-24	Evaluation of chikungunya virus infection in children from India during 2009-2010: A cross sectional observational study	Yes	English	India	Asia	Hospital	Children	0-18 Yrs				✔		unspecified	unspecified	723	Yes	Yes	Cross-sectional	Epidemic	IOL Lineage					✔			✔	unspecified	unspecified	Unspecified	Cross-sectional observational	2009-06-01	2010-05-31	1yr	Yes	Yes	249/723
57	Shrivastava et al 2011; PMID: 21328079	2021-03-24	Management of a vertically transmitted neonatal Chikungunya thrombocytopenia	Yes	English	Not stated	Unspecified	Hospital	Neonate	3 days	✔					1	0	1	unspecified	unspecified	Case report	unspecified	unspecified					✔		✔		unspecified	unspecified	Unspecified	Case report	unspecified	unspecified	unspecified	unspecified	unspecified	1/1
58	Torres et al 2016; PMID: 27619845	2021-03-30	Congenital and perinatal complications of chikungunya fever: a Latin American experience	Yes	English	Latin america		Hospital	Newborns	Less than 1 month	✔					unspecified	unspecified	169	Yes	Yes	Longitudinal	Epidemic	ECSA				✔				✔	unspecified	unspecified	unspecified	Prospective observational	2014-08-01	2014-10-01	3 months	unspecified	Unspecified	53/191
59	Balmaseda et al 2016; PMID: 26643531	2021-03-30	Clinical attack rate of chikungunya in a cohort of nicaraguan children	Yes	English	Nicaragua	North America	Community	Children	2-14 years				✔		1678	1699	3377	Yes	Yes	Longitudinal	Epidemic	unspecified				✔			✔		unspecified	unspecified	unspecified	Prospective cohort	Sep 2014	2015-03-01	7 months	Yes	Yes	Unspecified
60	Meena et al 2020; PMID: 33283675	2021-03-30	Neonatal Chikungunya: A case series	Yes	English	India	Asia	Hospital	neonates	<1month	✔					unspecified	unspecified	3	Yes	Yes	Case series	unspecified	unspecified					✔	✔			unspecified	unspecified	Unspecified	Case series	Unspecified	unspecified	unspecified	unspecified	unspecified	3/3
61	Gordon et al 2018; PMID: 29697796	2021-03-30	Differences in Transmission and Disease Severity between 2 Successive Waves of Chikungunya	Yes	English	Nicaragua	North America	Community	Children	2-14 years				✔		1	1	N=4353	Yes	Yes	Longitudinal	Epidemic	unspecified					✔			✔	unspecified	unspecified	Unspecified	prospective cohort	2014-03-01	2016-02-29	3 years	Yes	Yes	539/2327
62	Munoz et al 2016; PMID: 27869384	2021-03-30	Atypical mucocutaneous manifestations in neonates and infants with chikungunya fever in the municipalities of Cucuta, Los Patios and Villa del Rosario, Norte de Santander, Colombia, 2014	Yes	Spanish	Colombia	South America	Hospital		5 days - 5 months	✔					unspecified	unspecified	18	Yes	Yes	Cross-sectional	Unspecified	unspecified			✔					✔	unspecified	unspecified	unspecified	Unspecified	unspecified	2014-12-01	Cant tell	unspecified	Yes	11/18
63	Enter et al 2018; PMID: 30328407	2021-03-30	Perinatal outcomes in vertically infected neonates during a Chikungunya outbreak on the Island of Curacao	Yes	English	Curacao	South America	Hospital	Neonates	Newborns	✔					unspecified	unspecified	60	Yes	Yes	Case series	Epidemic	unspecified	✔					✔			unspecified	unspecified	Unspecified	unspecified	2014-09-01	2015-03-01	6 months	Yes	Yes	3/60
64	Landis et al 2017; PMID: 28884916	2021-03-25	Post-Chikungunya Rheumatic Disease in a 13-Year-Old Boy	Yes	English	US	North America	Hospital	Child	13 years			✔			unspecified	unspecified	1	unspecified	unspecified	Case report	unspecified	unspecified					✔				unspecified	unspecified	Unspecified	Case report	Unspecified	Unspecified	Unspecified	unspecified	Unspecified	1/1
65	Lyra et al 2016; PMID: 27555980	2021-03-25	Congenital Chikungunya Virus Infection after an Outbreak in Salvador, Bahia, Brazil	Yes	English	Brazil	South America	Hospital	neonates	1 day	✔					1	1	2	unspecified	unspecified	Case report	Epidemic	unspecified		✔					✔		unspecified	unspecified	Unspecified	Case report	2015-08-19	2015-09-12	1 Month	unspecified	Unspecified	2/2
66	Bhavana et al 2008; PMID: 18155781	2021-03-25	Chikungunya virus induced sudden sensorineural hearing loss	Yes	English	India	Asia	Hospital	Children	15yrs			✔			0	1	1	unspecified	unspecified	Case report	Epidemic	unspecified	✔					✔			unspecified	unspecified	Unspecified	Case report	Unspecified	unspecified	Unspecified	unspecified	unspecified	1/1
67	Yung seng et al 2010; PMID: 19935121	2021-03-25	Chikungunya mimicking atypical kawasaki disease in an infant	Yes	English	Singapore	Asia	Hospital	Infant	4month	✔					1	0	1	unspecified	unspecified	Case report	unspecified	unspecified		✔					✔		unspecified	unspecified	Unspecified	Case report	Unspecified	unspecified	Unspecified	unspecified	unspecified	1/1
68	Pinzon-Redondo et al 2016; PMID: 26986769	2021-03-25	Risk factors for severity of chikungunya in children: A prospective assessment	Yes	English	Colombia	South America	Hospital	Children	0-5 years				✔		unspecified	unspecified	59	Yes	Yes	Longitudinal	Epidemic	Asian genotype		✔					✔		unspecified	unspecified	Unspecified	Prospective cohort study	2014-09-22	2014-12-14	3 months	Yes	Yes	54/59
69	Reddy and Jinka 2018; doi.org/10.1542/neo.19-8-e502	2021-03-25	A case of neonatal thrombocytopenia and seizures: Diagnostic value of hyperpigmentation	Yes	English	India	Asia	Hospital	Neonate	3 days	✔					1	0	1	unspecified	unspecified	Case report	unspecified	unspecified					✔				unspecified	unspecified	unspecified	Case report	Unspecified	Unspecified	Unspecified	unspecified	unspecified	1/1
70	Kumar et al 2017; PMID: 27516419	2021-04-21	Epidemiology, Clinical and Laboratory Features and Course of Chikungunya among a Cohort of Children during the First Caribbean Epidemic	Yes	English	Barbados (Carribbean)	North America	Health centre	Children	0-15 YRS				✔		38	31	115	Yes	Yes	Longitudinal	Epidemic	unspecified		✔					✔		unspecified	unspecified	unspecified	Prospective study	2014-07-01	2014-12-01		Yes	Yes	69/115
71	Oliveira Sa et al 2017; PMID: 28562768	2021-04-21	Chikungunya virus infection with severe neurologic manifestations: Report of four fatal cases	Yes	English	Brazil	South America	Hospital	Child	5yrs		✔				unspecified	unspecified	1	unspecified	unspecified	Case report	Unspecified	unspecified					✔	✔			unspecified	unspecified	Unspecified	Case report	Jan 12 2016	Feb 4 2016	22 days	Yes	Yes	1/1
72	Murhekar et al 2019; PMID: 30715511	2021-04-14	Epidemiology of chikungunya based on laboratory surveillance data-India, 2016-2018	Yes	English	India	Asia	Hospital	Children	0-9yrs				✔		unspecified	unspecified	4903	Yes	Yes	Cross-sectional	unspecified	unspecified					✔				unspecified	unspecified	unspecified	Unspecified	2016-01-01	2018-07-01	2.5 years	Unspecified	Yes	678/4903
73	Tini and Rezza 2018; PMID: 30101066	2021-04-15	Morbilliform skin rash with prominent involvement of the palms in Chikungunya fever	Yes	English	Italy	Europe	Hospital	Teenager	15yrs			✔			0	1	1	unspecified	unspecified	Case report	unspecified	unspecified					✔	✔			unspecified	unspecified	Unspecified	Case report	2017-08-26	unspecified	unspecified	Yes	Unspecified	1/1
74	Chang et al 2010; PMID: 20881182	2021-04-15	Concurrent isolation of chikungunya virus and dengue virus from a patient with coinfection resulting from a trip to Singapore	Yes	English	India	Asia	Hospital	Children	12years		✔				unspecified	unspecified		unspecified	unspecified	Case report	unspecified	E1 - A22V mutant of ECSA					✔			✔	unspecified	unspecified	Unspecified	Case report	2009-04-17	2009-04-22	5 days	Unspecified	Unspecified	1/1
75	Manimuda et al 2010; MID: 20171708	2021-04-15	Clinical progression of chikungunya fever during acute and chronic arthritic stages and the changes in joint morphology as revealed by imaging	Yes	English	India	Asia	Hospital	Children	Above 10 yrs				✔		12	10	22	Yes	Yes	Longitudinal	Epidemic	unspecified					✔	✔			unspecified	unspecified	Unspecified	Longitudinal follow up study	2008-06-01	2009-04-01	8 months	Yes	Yes	22/22
76	Agarwal et al 2017; PMID: 28194661	2021-04-19	Guillain-Barre syndrome complicating chikungunya virus infection.	Yes	English	India	Asia	Hospital	Teenager	18yr			✔			1	0	1	unspecified	unspecified	Case report	Unspecified	unspecified					✔	✔			unspecified	unspecified	Unspecified	Case report	Unspecified	unspecified	unspecified	Unspecified	Unspecified	1/1
77	Nguyen et al 2017; PMID: 28719300	2021-04-14	Chikungunya and zika virus cases detected against a backdrop of endemic dengue transmission in Vietnam	Yes	English	Vietnam	Asia	Hospital	Children	1 - 15 years				✔		unspecified	unspecified	5617	Yes	Yes	Cross-sectional	Unspecified	IOL- ECSA					✔		✔		unspecified	unspecified	Yes	Retrospective diagnostic	2010-10-01	2014-12-01	4yrs 2months	Unspecified	Unspecified	4/5617
78	Nguyen et al 2015; PMID: 26407434	2021-04-14	Pruritic Rash in a Recent Traveler to Central America.	Yes	English	USA	North America	Hospital	Male	18yrs			✔			unspecified	unspecified	1	unspecified	unspecified	Case report	unspecified	unspecified					✔	✔			unspecified	unspecified	Unspecified	Case report	2014-12-01	2014-12-01		Unspecified	Unspecified	1/1
79	Singh et al 2017; PMID: 28361790	2021-04-14	Neurological Manifestations of Chikungunya in Children.	Yes	English	India	Asia	Hospital	Children	6-10 yrs		✔				unspecified	unspecified	48	Yes	Yes	Longitudinal	Epidemic	unspecified					✔			✔	unspecified	unspecified	Unspecified	unspecified	Unspecified	unspecified	unspecified	unspecified	unspecified	5/48
80	Pfeffer et al 2010; PMID: 20394712	2021-04-14	Chikungunya fever in two German tourists returning from the Maldives, September, 2009.	Yes	English	Germany	Europe	Hospital	Child	7yrs		✔				1	0	1	unspecified	unspecified	Case report	unspecified	E1 ; A226V Mutant		✔					✔		unspecified	unspecified	Unspecified	Case report	2009-09-01	2009-09-10	10 days	unspecified	unspecified	1/1
81	Kajeguka et al 2017; doi:10.4314/thrb.v19i4.1	2021-04-13	Mapping clusters of chikungunya and dengue transmission in northern Tanzania using disease exposure and vector data	Yes	English	Tanzania	Africa	Community	Children	0-15yrs				✔		unspecified	unspecified	194	Yes	Yes	Cross-sectional	unspecified	unspecified	✔								unspecified	unspecified	unspecified	Cross sectional survey	2015-06-01	2016-02-01	2 months	Unspecified	Yes	23/194
82	Dwibedi et al 2011; PMID: 21441687	2021-04-13	Rapid spread of Chikungunya virus infection in Orissa: India	Yes	English	India	Asia	Community	Children	0-15yrs				✔		44	65	109	Yes	Yes	Cross-sectional	Epidemic	unspecified	✔					✔			unspecified	unspecified	unspecified	Unspecified	2006-02-01	2007-11-01	1yr 9 months	Yes	Yes	25/109
83	Chandramathi et al 2020; PMID: 32556042	2021-03-02	The "chik sign" in neonatal chikungunya	Yes	English	India	Asia		Infant	15 day old	✔					1	0	1	No	No	Case report	unspecified	unspecified	✔								unspecified	unspecified	Unspecified	Case report	unspecified	unspecified	unspecified	unspecified	unspecified	1/1
84	Paternina-Caicedo et al 2018; PMID: 28444295	2021-03-02	Features of dengue and chikungunya infections of colombian children under 24 months of age admitted to the emergency department	Yes	English	Colombia	South America		Children	0-24 months				✔		22	15	176	Yes	Yes	Longitudinal	unspecified	unspecified					✔		✔		unspecified	unspecified	Unspecified	Prospective cohort	2014-09-01	2014-12-01	~3 months	unspecified	Yes	37/176
85	Garg et al 2018; PMID: 29573443	2021-03-02	Stevens-Johnson syndrome and toxic epidermal necrolysis-like cutaneous presentation of chikungunya fever: A case series	Yes	English	India	Asia		Children and infants	1-36 months				✔		13	8	21	No	No	Case series	unspecified	unspecified	✔					✔			unspecified	unspecified	Unspecified	Case series	unspecified	unspecified	unspecified	unspecified	unspecified	7/21
86	Gavotto et al 2019; PMID: 31281036	2021-03-02	Chikungunya disease among infants in French West Indies during the 2014 outbreak	Yes	English	West Indies, France	North America		Infants	1 month-2 years				✔		91	63	154	Yes	Yes	Cross-sectional	unspecified	unspecified		✔					✔		unspecified	unspecified	All children who consulted in the PAPUH pediatric emergency room and were subsequently hospitalized for Chikungunya according to PCR testing	Single centre cross-sectional study	2014-05-01	2014-09-01	5 months	No	No	154/154
87	Proesmans et al 2019; PMID: 31487279	2021-03-02	Dengue and chikungunya among outpatients with acute undifferentiated fever in Kinshasa, Democratic Republic of Congo: A cross-sectional study	Yes	English	Kinshasa, DRC	Africa		Children	children <18 years				✔		unspecified	unspecified	180	Yes	Yes	Cross-sectional	unspecified	unspecified				✔				✔	unspecified	unspecified	patients of at least 2 years old, presenting at the outpatient department with a history of acute fever (i.e. ≥ 2 days and ≤ 7 days) or having an axillary temperature of ≥ 37.5°C	Cross-sectional prospective study	2015-11-01	2016-06-01	8 months	Yes	Yes	0/180
88	Capeding et al 2013; PMID: 23936565	2021-03-02	Dengue and Other Common Causes of Acute Febrile Illness in Asia: An Active Surveillance Study in Children	Yes	English	Asia (Indonesia, Malaysia, Philippines, Thailand, Vietnam	Asia		Children	2-14 years				✔		742	758	1500	Yes	Yes	Longitudinal	unspecified	unspecified	✔					✔			unspecified	unspecified	unspecified	Prospective, multicentre, active surveillance cohort study	2010-06-01	2011-07-01	13 months	Yes	Yes	101/1500
89	Valamparampil et al 2009; PMID: 19330303	2021-03-02	Clinical profile of Chikungunya in infants	Yes	English	India	Asia		Infants	1-12 months				✔		34	22	unspecified	Yes	Yes	Cross-sectional	unspecified	unspecified	✔					✔			unspecified	unspecified	All infants with fever and with any one of the following features; seizure, loose stools, peripheral cyanosis or skin manifestations at the Institute of Child Health, Kottayam	Cross-sectional (unspecified)	2007-05-01	2007-07-01	2 months	No	No	56/unspecified
90	Waggoner et al 2017; PMID: 28702473	2021-03-02	Malaria and Chikungunya Detected Using Molecular Diagnostics Among Febrile Kenyan Children	Yes	English	Kenya	Africa		Children	mean age (SD): 5.05 (3.46) <18 years				✔		190	193	383	No	No	Surveillance	Both	unspecified		✔					✔		unspecified	unspecified	unspecified	surveillance study	2014-01-16	2015-07-03	17 months	No	Yes	32/383
91	Gunturiz et al 2018; PMID: 30184357	2021-03-02	Congenital cerebral toxoplasmosis, Zika and chikungunya virus infections: A case report	Yes	Spanish	Colombia	South America		Pregnant women	18 years			✔			0	1	1	unspecified	unspecified	Case report	unspecified	unspecified		✔					✔		unspecified	unspecified	Unspecified	Case report	Unspecified	Unspecified	Unspecified	Unspecified	unspecified	1/1
92	Ramirez-Zamora et al 2020; PMID: 32672351	2021-03-30	[Hemicerebellitis due to chikungunya associated with refractory status epilepticus in the paediatric age].	Yes	Spanish	El Salvador/Spain??	Central America	Hospital	Child	4 years 4 months		✔				1	0	1	unspecified	unspecified	Case report	unspecified	unspecified	✔					✔			unspecified	unspecified	Unspecified	Case report	Unspecified	Unspecified	Unspecified	Unspecified	unspecified	1/1
93	Dabas et al 2019; PMID: 31617869	2021-03-02	Diffuse Hyperpigmentation in Infants During Monsoon Season.	Yes	English	India	Asia	Hospital	Infants	9 days- 11 months	✔					8	4	12	unspecified	unspecified	Case series	Epidemic (moonson season)	unspecified					✔	✔			unspecified	unspecified	Unspecified	Case series	unspecified	unspecified	unspecified	Yes	unspecified	12/12
94	Chattopadhyay et al 2016; PMID: 27080776	2021-03-02	Chikungunya virus infection in West Bengal, India	Yes	English	India	Asia	Hospital	Children	Children 0-10 years				✔		2	3	23	Yes	Yes	Cross-sectional	unspecified	unspecified	✔					✔			unspecified	unspecified	All suspected cases complaining of fever of short duration (≤2 weeks) with/without joint pain and/or rash attending the OPD and in door of a tertiary care hospital in Kolkata were selected	Community based cross-sectional study??	2011-04-01	2011-09-01	6 months	Yes	Yes	5/23
95	Shukla et al 2020; PMID: 32756979	2021-03-02	Long-Term Neurodevelopmental Outcomes of Neonatal Chikungunya: Follow-Up of a Series of Cases Till 1 Year.	Yes	English	India	Asia	Hospital/healthcare facility	Neonates	12-13 months				✔		10	3	13	Yes	Yes	Case series	epidemic	unspecified	✔					✔			unspecified	unspecified	neonates discharged with a diagnosis of Neonatal Chikungunya	Case series	2016-11-01	2018-01-01	14 months	Yes	Yes	13/13
96	Singh et al 2014; PMID: 25593800	2021-03-04	Vesiculobullous viral exanthem due to chikungunya in an infant.	Yes	English	India	Asia	Hospital	Noenate	6 months	✔					1	0	1	unspecified	unspecified	Case report	unspecified	unspecified	✔					✔			unspecified	unspecified	Unspecified	Case report	Unspecified	Unspecified	Unspecified	Unspecified	unspecified	1/1
97	Kinimi et al 2018; PMID: 30834070	2021-03-04	Evidence of chikungunya virus infection among febrile patients seeking healthcare in selected districts of Tanzania	Yes	English	Tanzania	Africa	Health facilities	Children	children between 1 - 19 years (n=256)				✔		unspecified	unspecified	256	Yes	Yes	Cross-sectional	Epidemic	unspecified	✔					✔			unspecified	unspecified	Random sampling of districts	Facility based cross-sectional study	2015-05-01	2015-06-01	2 months	Yes	Yes	5/256
98	Carrillo et al 2019; PMID: 30463967	2021-03-09	Epidemiological evidence for lineage-specific differences in the risk of inapparent Chikungunya virus infection	Yes	English	Nicaragua	North America	Health Centre and community	Children	Children: ≤ 16 years				✔		24	36	60	Yes	Yes	Longitudinal	Epidemic	unspecified				✔				✔	IgM: 89.8% (82.0%, 95.0%)	IgM: 95.7% (91.3%, 98.2%)	Individuals presented to the HCSFV with chikungunya-like signs/symptoms and were confirmed as being CHIKV positive by real-time reverse transcription-PCR (rRT-PCR) (52), study personnel visited their homes 1 to 2 days later to invite them to participate in the study as an index case. At that time, household members were invited to participate as contacts.	Prospective cohort	2015-10-01	2015-11-01	1 month	Yes	Yes	60/60
99	Laoprasopwattana et al 2020; PMID: 32016406	2021-03-09	Using clinical profiles and complete blood counts to differentiate causes of acute febrile illness during the 2009-11 outbreak of typhoid and chikungunya in a dengue endemic area	Yes	English	Thailand	Asia	Hospital	Children	2-15 years				✔		142	122	264	Yes	Yes	Cross-sectional	Epidemic	unspecified		✔					✔		unspecified	unspecified	Purposive sampling	Retrospective study	2009	2011	3 years	No	No	25/264
100	Balmaseda et al 2016; PMID: 26643531	2021-03-09	Attack rate of chikungunya in nicaraguan children during the first two waves of the epidemic, 2014-2016	Yes	English	Nicaragua	North America	Community	Children	2-14 years				✔		1678	1699	3377	Yes	Yes	Longitudinal	Epidemic	unspecified		✔					✔		unspecified	unspecified	unspecified	Prospective cohort design	2014-09-01	2015-03-01	7 months	Yes	Yes	96/3377
101	Nobrega et al 2020; PMID: 32426307	2021-03-11	NMDAR Encephalitis Associated With Acute Chikungunya Virus Infection: A New Trigger?	Yes	English	Brazil	South America	Hospital	Child	5 yeay old		✔				1	0	1	unspecified	unspecified	Case report	unspecified	unspecified	✔							✔	unspecified	unspecified	unspecified	Case report	Unspecified	Unspecified	Unspecified	yes	Yes	1/1
102	Nyamwaya et al 2021; PMID: 33602147	2021-03-15	Chikungunya virus infection is causing acute febrile illness among children in Kenya	Yes	English	Kenya	Africa	Health Centres	Children	<16 years				✔		222	221	3500	Yes	Yes	Longitudinal	Epidemic	ECSA genotype		✔					✔		unspecified	unspecified	Random	Prospective cohort	2014-03-01	2018-10-01	3 years 8 months	Yes	Yes	443/3500
103	Robin et al 2009; PMID: 19401826	2021-03-18	Severe bullous skin lesions associated with Chikungunya virus infection in small infants	Yes	English	La Reunion Island	Africa	Hospital	Children	<18 years				✔		unspecified	unspecified	122	Unspecified	Unspecified	Longitudinal	Epidemic	unspecified				✔				✔	unspecified	unspecified	All included	Retrospective descriptive study	1st March 2005	1st October 2006	1 year 7 months	unspecified	Unspecified	122/122
104	Hsu et al 2019; PMID: 30640900	2021-03-18	Risk factors for infection with chikungunya and Zika viruses in a community-based cohort study in Southern Puerto Rico	Yes	English	Puerto Rico	North America	Hospitals	Children	0-9 years				✔		Unspecified	Unspecified	419	Yes	Yes	Cross-sectional	Epidemic	unspecified		✔						✔	unspecified	unspecified	all included	Retrospective cross-sectional study	2014-05-01	2014-12-01	8 months	Yes	Yes	119/419
105	Gerardin et al 2014; PMID: 25033077	2021-03-19	Neurocognitive Outcome of Children Exposed to Perinatal Mother-to-Child Chikungunya Virus Infection: The CHIMERE Cohort Study on Reunion Island	Yes	English	Reunion Island	Africa	Hospital	Neonates	unspecified					✔	unspecified	unspecified	1298	Yes	Yes	Longitudinal	Epidemic	unspecified				✔				✔	unspecified	unspecified	Purposive	multi-centre ambispective cohort study	2006-04-01	2006-08-01	5 months	Yes	Yes	33/1298
106	Srinivas et al 2020; PMID: 33106456	2021-03-19	Congenital chikungunya rash with dystrophic calcification	Yes	English	India	Asia	Hospital	Neonate	11-day old	✔					1	0	1	unspecified	unspecified	Case report	unspecified	unspecified	✔					✔			unspecified	unspecified	Unspecified	Case-report	Unspecified	Unspecified	Unspecified	Yes	unspecified	1/1
107	Dutta et al 2017; PMID: 28397145	2021-03-19	A case of atypical ophthalmoplegia after Chikungunya fever	Yes	English	India	Asia	Hospital	Child	5 years		✔				0	1	1	unspecified	unspecified	Case report	Epidemic	unspecified	✔					✔			unspecified	unspecified	Unspecified	Case-report	Unspecified	Unspecified	Unspecified	unspecified	unspecified	1/1
108	Peter et al 2015 (doi: 10.4103/2249-4847.154134)	2021-03-19	Chikungunya in a newborn	Yes	English	Unspecified (India?)	Unspecified	unspecified	Infant	6 days	✔					0	1	1	unspecified	unspecified	Case report	Unspecified	unspecified	✔					✔			unspecified	unspecified	Unspecified	Case report	Unspecified	Unspecified	Unspecified	unspecified	unspecified	1/1
109	Besera et al 2019; PMID: 30994798	2021-03-19	Clinical and laboratory profiles of children with severe chikungunya infection	Yes	English	Brazil	South America	Hospital	Children	1month-15 years				✔		7	7	14	Yes	No	Case series	Epidemic	unspecified	✔					✔			unspecified	unspecified	All included	Case-series	2016-05-01	2017-04-01	11 months	unspecified	Yes	14/14
110	Christie et al 2016; doi:10.7727/wimj.2016.529	2021-03-19	Chikungunya virus epidemic in Jamaican children - Clinical features and public health effects	Yes	English	Jamaica	North America	Hospital	Children	0-18 years				✔		124	86	210	No	No	Cross-sectional	Epidemic	unspecified				✔				✔	unspecified	unspecified	all included	unspecified	2014-08-01	2014-10-01	3 months	unspecified	unspecified	210/210
111	Castellano et al 2020; PMID: 33075526	2021-03-22	Dengue-chikungunya coinfection outbreak in children from Cali, Colombia, in 2018-2019	Yes	English	Colombia	South America	Hospital	Children	<18 years				✔		179	166	345	Yes	Yes	Longitudinal	unspecified	unspecified				✔				✔	unspecified	unspecified	all included within the study period	descriptive prospective study	2018-07-01	2019-08-01	13 months	Yes	Yes	143/345
112	Karthiga et al 2016; PMID: 27857791	2021-03-22	Perinatal chikungunya in twins	Yes	English	India	Asia	Hospital	Heterozygous twin neonates	36 weeks	✔					1	1	2	unspecified	unspecified	Case report	unspecified	unspecified	✔					✔			unspecified	unspecified	Unspecified	Case report	N/A	N/A	N/A	unspecified	unspecified	2/2
113	Duarte et al 2019; PMID: 32142153	2021-03-22	Maternal and congenital infections arising from Zika, dengue and Chikungunya arboviruses in Salvador, Brazil	Yes	English	Brazil	South America	Hospital	Newborns	unspecified					✔	55	47	102	No	No	Cross-sectional	unspecified	unspecified	✔					✔			unspecified	unspecified	all included within the study period	cross-sectional study	2016-01-01	2016-12-01	12 months	Yes	Yes	3/102
114	Renghevendar et al 2019; PMID: 30707708	2021-03-23	Virus load and clinical features during the acute phase of Chikungunya infection in children	Yes	English	India	Asia	Hospital	Children	<18 years				✔		34	20	338	Yes	Yes	Cross-sectional	unspecified	unspecified		✔					✔		unspecified	unspecified	unspecified	cross sectional observational study	June 1, 2009	May 31, 2010	12 months	unspecified	unspecified	54/338
115	Passi et al 2008	2021-03-23	Chikungunya infection in neonates	Yes	English	India	Asia	Hospital	Neonates	Newborn; 21 day neonate	✔					2	0	2	unspecified	unspecified	Case report	unspecified	unspecified		✔					✔		unspecified	unspecified	Unspecified	Case reports	N/A	N/A	N/A	unspecified	unspecified	2/2
116	Kalane et al 2015 (doi:10.22038/IJP.2015.4207)	2021-03-23	Congenital chikungunya with centro-facial pigmentation and persistent thrombocytopenia: A case report	Yes	English	India	Asia	Hospital	Neonate	14 days	✔					1	0	1	unspecified	unspecified	Case report	unspecified	unspecified	✔					✔			unspecified	unspecified	Unspecified	Case report	N/A	N/A	N/A	unspecified	unspecified	1/1
117	Vasani et al 2016; PMID: 26205895	2021-03-23	Congenital Chikungunya - A cause of neonatal hyperpigmentation	Yes	English	India	Asia	Hospital	Neonate	12 day	✔					1	0	1	unspecified	unspecified	Case report	unspecified	unspecified	✔					✔			unspecified	unspecified	Unspecified	Case report	N/A	N/A	N/A	unspecified	unspecified	1/1
118	Olajiga et al 2017; PMID: 28742401	2021-03-23	Chikungunya Virus Seroprevalence and Associated Factors among Hospital Attendees in Two States of Southwest Nigeria: A Preliminary Assessment.	Yes	English	Nigeria	Africa	Hospital	Children	10-17 years				✔		unspecified	unspecified	29	Yes	Yes	Cross-sectional	unspecified	unspecified	✔					✔			1	1	Unspecified	cross-sectional, hospital-based study	November, 2015	September, 2016	11 months	Yes	Yes	3/11
119	Michlmayr et al 2018; PMID: 30150281	2021-03-23	Comprehensive innate immune profiling of chikungunya virus infection in pediatric cases.	Yes	English	Nicaragua	North America	Hospital	Children	6 months-14 years				✔		31	11	42	Yes	Yes	Cross-sectional	unspecified	unspecified		✔					✔		unspecified	unspecified	Unspecified	unspecified	2015-09-01	2016-04-01	8 months	Yes	Yes	42/42
120	Qiaoli et al 2012; PMID: 22916166	2021-03-23	Maiden outbreak of chikungunya in Dongguan city, Guangdong province, China: epidemiological characteristics.	Yes	English	China	Asia	Community	Children	<10				✔		unspecified	unspecified	810	Yes	Yes	Surveillance	unspecified	unspecified		✔						✔	unspecified	unspecified	Purposive	Survey	unspecified	unspecified	unspecified	Yes	Yes	5/810
121	Maria et al 2018; PMID: 30218513	2021-03-23	Encephalitic presentation of Neonatal Chikungunya: A Case Series	Yes	English	India	Asia	Hospital	Neonates	unspecified					✔	11	3	99	No	No	Case series	unspecified	unspecified	✔					✔			unspecified	unspecified	unspecified	Case series	2016-08-01	2016-11-01	4 months	unspecified	unspecified	13/99
122	Sharma et al 2018; PMID: 30124414	2021-03-30	Severe manifestations of chikungunya fever in children, India, 2016	Yes	English	India	Asia	Hospital	Children	0-15 years				✔		unspecified	unspecified	49	Yes	Yes	Cross-sectional	Epidemic	unspecified		✔					✔		unspecified	unspecified	All included	Retrospective cross-sectional study	2016-09-01	2016-12-01	4 months	unspecified	unspecified	49/49
123	Ball et al 2019; PMID: 30184178	2021-03-30	Clinical and Epidemiologic Patterns of Chikungunya Virus Infection and Coincident Arboviral Disease in a School Cohort in Haiti, 2014-2015.	Yes	English	Haiti	North America	School/school clinic	Children	<20 years (mean age 8.8 years)				✔		685	705	1390	Yes	Yes	Cross-sectional	non-epidemic	unspecified		✔					✔		unspecicified	unspecified	All included	Cross-sectional	2014-05-01	2015-02-01	10 months	Yes	Yes	74/1390
124	Sharma et al 2018; PMID: 29325169	2021-03-26	Severe Sepsis and Septic Shock Associated with Chikungunya Fever in an Adolescent	Yes	English	India	Asia	Hospital	Adolescent	12 years		✔				1	0	1	unspecified	unspecified	Case report	unspecified	unspecified		✔					✔		unspecified	unspecified	Unspecified	Case-report	N/A	N/A	N/A	unspecified	unspecified	1/1
125	Ferreira et al 2019; PMID: 30657982	2021-03-26	Late Identification of Chikungunya Virus in the Central Nervous System of a 2-Month-Old Infant: Persistence of Maternal-Neonatal Infection?	Yes	English	Brazil	South America	Hospital	Neonate	2 months	✔					unspecified	unspecified	1	unspecified	unspecified	Case report	unspecified	unspecified			✔					✔	unspecified	unspecified	Unspecified	Case-report	N/A	N/A	N/A	unspecifed	unspecified	1/1
126	Villamil-Gomez et al 2015; PMID: 26246086	2021-03-26	Congenital Chikungunya Virus Infection in Sincelejo, Colombia: A Case Series	Yes	English	Colombia	South America	Hospital	Neonate	newborns	✔					unspecified	unspecified	8	unspecified	unspecified	Case series	Epidemic	unspecified			✔					✔	unspecified	unspecified	Unspecified	Case-series	2014-09-01	2015-02-28	5 months	Unspecified	Unspecified	8/8
127	Brighton et al 1983; PMID: 6298956	2021-04-19	Chikungunya virus infection. A retrospective study of 107 cases	Yes	English	South Africa	Africa	Community	Children	Below 16 yrs				✔		unspecified	unspecified	107	Yes	Yes	Case series	Epidemic	unspecified					✔				unspecified	unspecified	Unspecified	Retrospective study	1975	1977	3 Yrs	unspecified	Unspecified	43/107
128	Parola et al 2006; PMID: 17176562	2021-04-19	Novel chikungunya virus variant in travelers returning from Indian Ocean islands.	Yes	English	France	Europe	Hospital	Child	5 months	✔					unspecified	unspecified	1	unspecified	unspecified	Case report	Unspecified	unspecified					✔		✔		unspecified	unspecified	Unspecified	Case report	2006-02-01			Unspecified	Unspecified	1/1
129	Tavakoli et al 2020; PMID: 32100659	2021-04-20	Seroepidemiology of dengue and chikungunya fever in patients with rash and fever in Iran, 2017.	Yes	English	Iran	Asia	Community	Children	Infants and youths (< 1 – 18 years)				✔		unspecified	unspecified	1195	unspecified	unspecified	Unspecified	Unspecified	unspecified	✔					✔			unspecified	unspecified	Unspecified	unspecified	2016-12-01	2017-11-01	11 months	unspecified	unspecified	198/1195
130	Correa et al 2020; PMID: 32955404	2021-04-20	Longitudinal brain magnetic resonance imaging of children with perinatal Chikungunya encephalitis	Yes	English	Brazil	South America	Hospital	Children	• Infant 1 (4,5,6-day-old)	✔					0	1	3	unspecified	unspecified	Case report	Unspecified	unspecified				✔				✔	unspecified	unspecified	Unspecified	Case report	N/A	N/A	N/A	Yes	Yes	3/3
131	van Keulen et al 2018; PMID: 29135829	2021-04-20	Chikungunya Virus Infections Among InfantsWho Classification Not Applicable	Yes	English	Curacao	South America	Hospital	Infants	1 week-6months	✔					9	13	22	Yes	Yes	Case series	Epidemic	unspecified	✔					✔			unspecified	unspecified	Purposive sampling	Case series	2014-09-01	2015-01-01	5 months	unspecified	Yes	22/22
132	Le et al 2020; PMID: 32700661	2021-04-21	Interepidemic detection of chikungunya virus infection and transmission in Northeastern Thailand	Yes	Englsh	Thailand	Asia	Community	Children	Children (0-14 years)				✔		unspecified	unspecified	106	Yes	Yes	Longitudinal	unspecified	East/Central/South Africa (ECSA)				✔				✔	unspecified	unspecified	Purposive	Case-control	2016-06-01	2017-10-01	16 months	Yes	Yes	7/106
133	Pessoa et al 2016; PMID: 27015222	2021-04-21	Investigation into an outbreak of dengue-like illness in pernambuco, Brazil, revealed a cocirculation of Zika, Chikungunya, and dengue virus type 1	Yes	English	Brazil	South America	Community	Children	Children (1-10 years)		✔				4	7	10	Yes	Yes	Cross-sectional	Epidemic	unspecified			✔					✔	unspecified	unspecified	Purposive	unspecified (cross-sectional)	2015-05-01	2015-05-01	5 days	Yes	Yes	1/10
134	Sissoko et al 2010; PMID: 20214759	2021-04-21	Field evaluation of clinical features during chikungunya outbreak in Mayotte, 2005-2006	Yes	English	Mayotte	Africa	Community	Children	Children (1-14 years)				✔		unspecified	unspecified	302	Yes	Yes	Cross-sectional	Epidemic	unspecified	✔							✔	IgM-96.9%	IgM-98.3%	multistage cluster sampling scheme	cross‐sectional serologic survey	2006-11-01	2006-12-01	1 month	Yes	Yes	106/302
135	Swaminathan and Swaminathan 2020; PMID: 32104718	2021-04-22	Nail findings in Chikungunya infection	Yes	English	USA	North America	Hospital	Adolescent	17 years			✔			0	1	1	unspecified	unspecified	Case report	unspecified	unspecified	✔					✔			unspecified	unspecified	Unspecified	Case report	N/A	N/A	N/A	unspecified	unspecified	1/1
136	Kumar et al 2007; PMID: 18219080	2021-04-22	Molecular characterization of chikungunya virus from Andhra Pradesh, India & phylogenetic relationship with Central African isolates	Yes	English	India	Asia	Hospital	Children	children (11-18 years)				✔		3	1	4	Yes	No	Cross-sectional	unspecified	Central/East African genotype, Asian genotype, West Africa genotype		✔					✔		unspecified	unspecified	Purposive	Cross-sectional	2006-04-01	2006-10-01	7 months	unspecified	unspecified	1/3
137	Dhar et al 2018; PMID: 29749118	2021-04-22	A child with peculiar pigmentation after a bout of fever	Yes	English	India	Asia	Hospital	Child	4 years		✔				unspecified	unspecified	1	unspecified	unspecified	Case report	unspecified	unspecified	✔					✔			unspecified	unspecified	Unspecified	Case report	N/A	NA	N/A	unspecified	unspecified	1/1
138	Fabrice et al 2007; PMID: 17505252	2021-04-22	Chikungunya infection: An emerging rheumatism among travelers returned from Indian Ocean islands. Report of 47 cases	Yes	English	France	Europe	Hospital	Children	5 month old child n=1	✔					1	0	1	Yes	No	Cross-sectional	unspecified	unspecified				✔				✔	unspecified	unspecified	Purposive	unspecified (cross-sectional)	2005-02-01	2006-04-01	14 months	Yes	Yes	1/1
139	Singh et al 2012; PMID: 21906409	2021-04-26	The first dominant co-circulation of both dengue and chikungunya viruses during the post-monsoon period of 2010 in Delhi, India	Yes	English	India	Asia	Unspecified	children	Children (8-18 years)				✔		5	1	6	Yes	No	Cross-sectional	Epidemic	Central South African (ECSA) genotype		✔					✔		unspecified	Unspecified	Unspecified	unspecified	2010-08-01	2010-11-01	4 months	No	No	3/3
140	Shiferaw et al 2015; PMID: 26793467	2021-04-22	The Chikungunya Epidemic: A look at five cases	Yes	English	USA	North America	Hospital	Adolescent	14 years				✔		0	1	1	unspecified	unspecified	Case report	Unspecified	unspecified					✔	✔			unspecified	unspecified	Unspecified	Case report	2014-08-28	unspecified	unspecified	unspecified	Unspecified	1/1
141	Mudurangaplar et al 2015; PMID: 26155474	2021-04-22	Seroepidemiological survey of Chikungunya in and around the regions of Bijapur (Vijayapura - north Karnataka)	Yes	English	India	Asia	Hospital	Children	below 15yrs				✔		unspecified	unspecified	36	No	No	Cross-sectional	Unspecified	unspecified	✔					✔			unspecified	unspecified	Unspecified	Unspeified	2011-04-01	2014-12-01	3.5 years	Yes	Unspecified	1/36
142	Pakran et al 2010; PMID: 21182504	2021-04-21	Purpuric macules with vesiculobullous lesions: A novel manifestation of Chikungunya	Yes	English	India	Asia	Hospital	Children	0 - 12 Years				✔		unspecified	unspecified	9	Yes	Yes	Longitudinal	unspecified	unspecified					✔	✔			unspecified	unspecified	Unspecified	Prospective descriptive hospital based study	July 1 2009	Sept 1 2009	3 months	unspecified	unspecified	9/9
